# Supplementary material for: Following the temperature-induced activation of carbon-supported trigonal Pd3 nanoclusters for catalysis
Source: Royal Society of Chemistry journal article supplement (doi:10.1039/d3cy01316b), 2023-12-15
Supplement: d3cy01316b1.pdf [file d3cy01316b1.pdf]

*Supplementary Information*

*for*

**Following the temperature-induced activation of carbon-supported  
trigonal Pd<sub>3</sub> nanoclusters for catalysis**

Siddhant Singh,<sup>a</sup> Kazeem O. Sulaiman,<sup>a</sup> Mahwar,<sup>a</sup> Robert W. J. Scott\*<sup>a</sup>

Department of Chemistry, University of Saskatchewan, 110 Science Place, Saskatoon, Saskatchewan S7N 5C9,  
Canada. E-mail: [robert.scott@usask.ca](mailto:robert.scott@usask.ca)

**Keywords:** Metal nanoclusters, Selective Hydrogenation, Palladium, XAS, differential PDF, Cross-Coupling

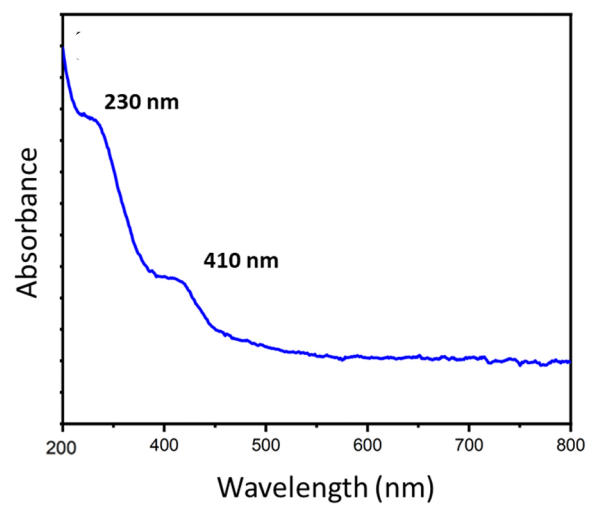

**Fig S1.** UV-Visible spectra of Pd<sub>3</sub> NCs in ethanol after a week.

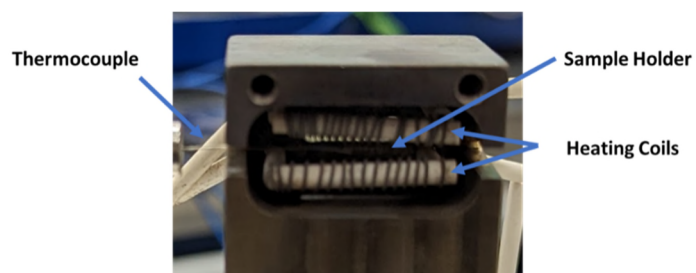

**Fig S2.** High-temperature furnace setup used for *in-situ* dPDF studies.

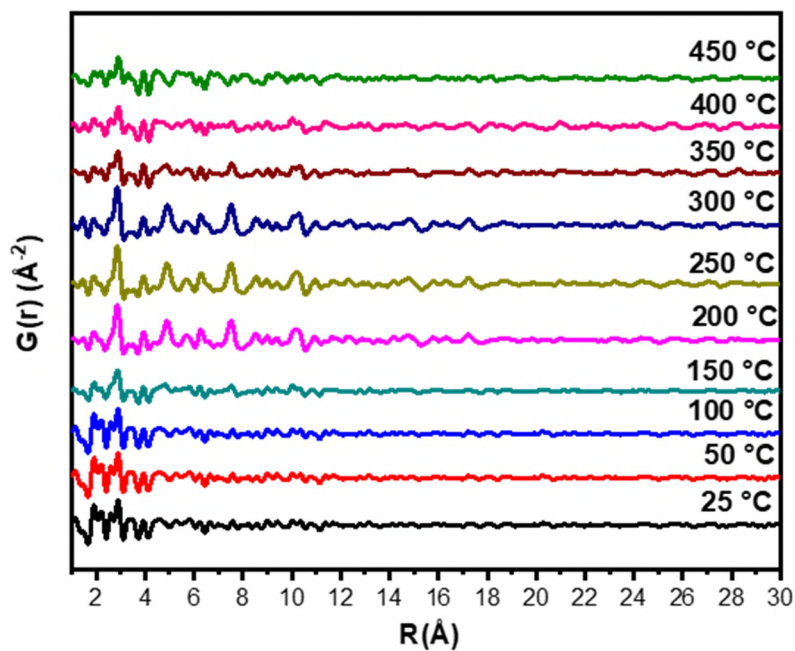

Fig S3. Long distance dPDF plots,  $G(r)$  of  $\text{Pd}_3@C$  upon *in-situ* heating.

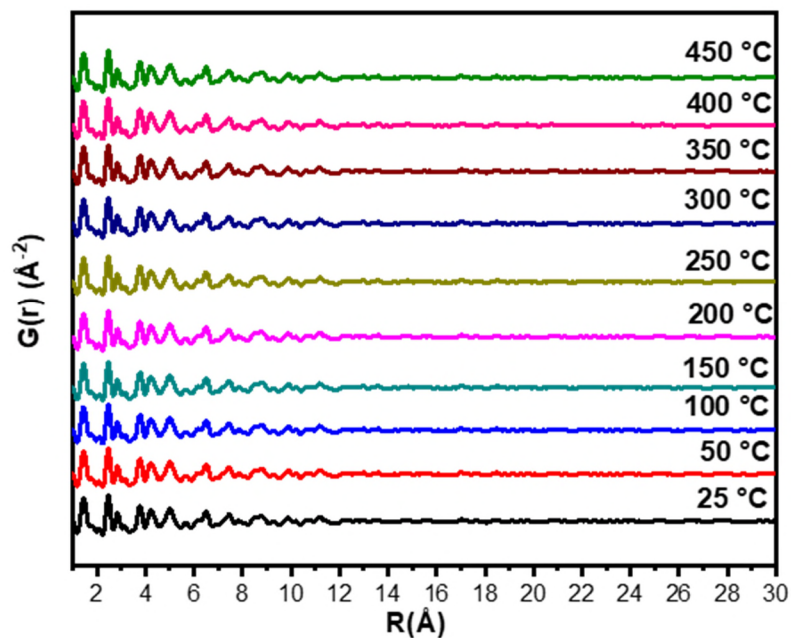

Fig S4. PDF plots,  $G(r)$  of carbon support upon *in-situ* heating.

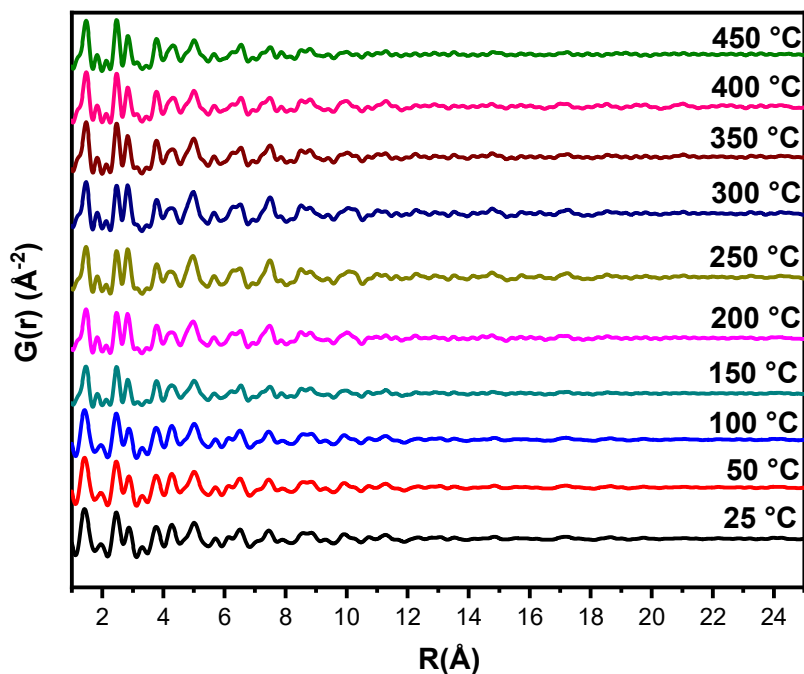

Fig S5. PDF plots,  $G(r)$  of Pd<sub>3</sub>@C upon in-situ heating.

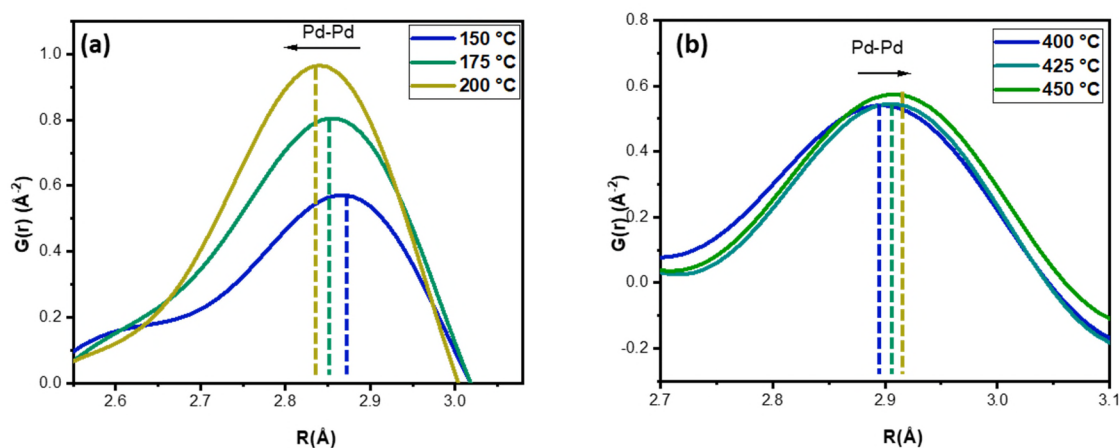

Fig S6. Overlay of in-situ dPDFs,  $G(r)$  of Pd<sub>3</sub>@C collected at different temperatures: (a) to visualize the decrease in Pd-Pd bond length upon in-situ heating at 150-250 °C; (b) to visualize the increase in the Pd-Pd bond length and the intensity of Pd-Pd peak during transition of temperature from 400 to 450 °C.

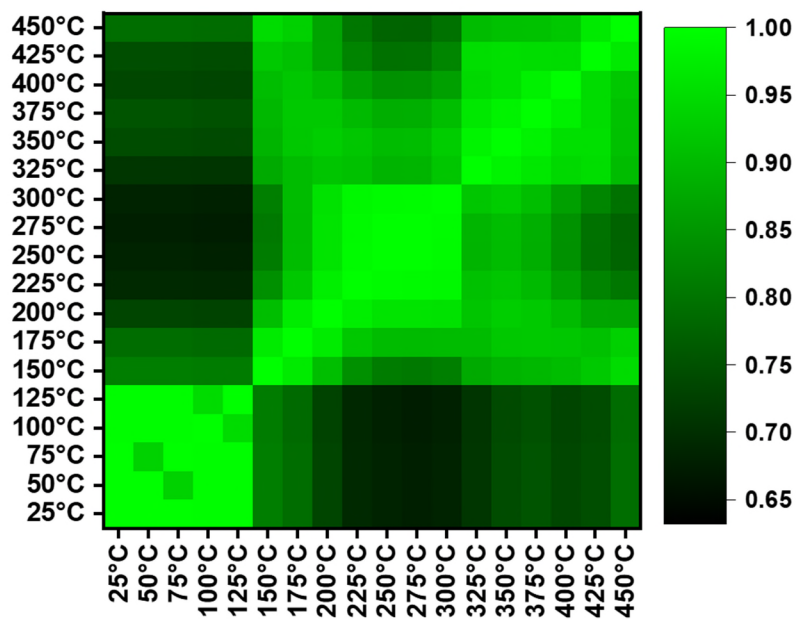

**Fig S7.** Heatmap of the Pearson correlation matrix analysis of the dPDF G(r) a R range 1.5-25 Å of Pd<sub>3</sub>@C system upon in-situ heating.

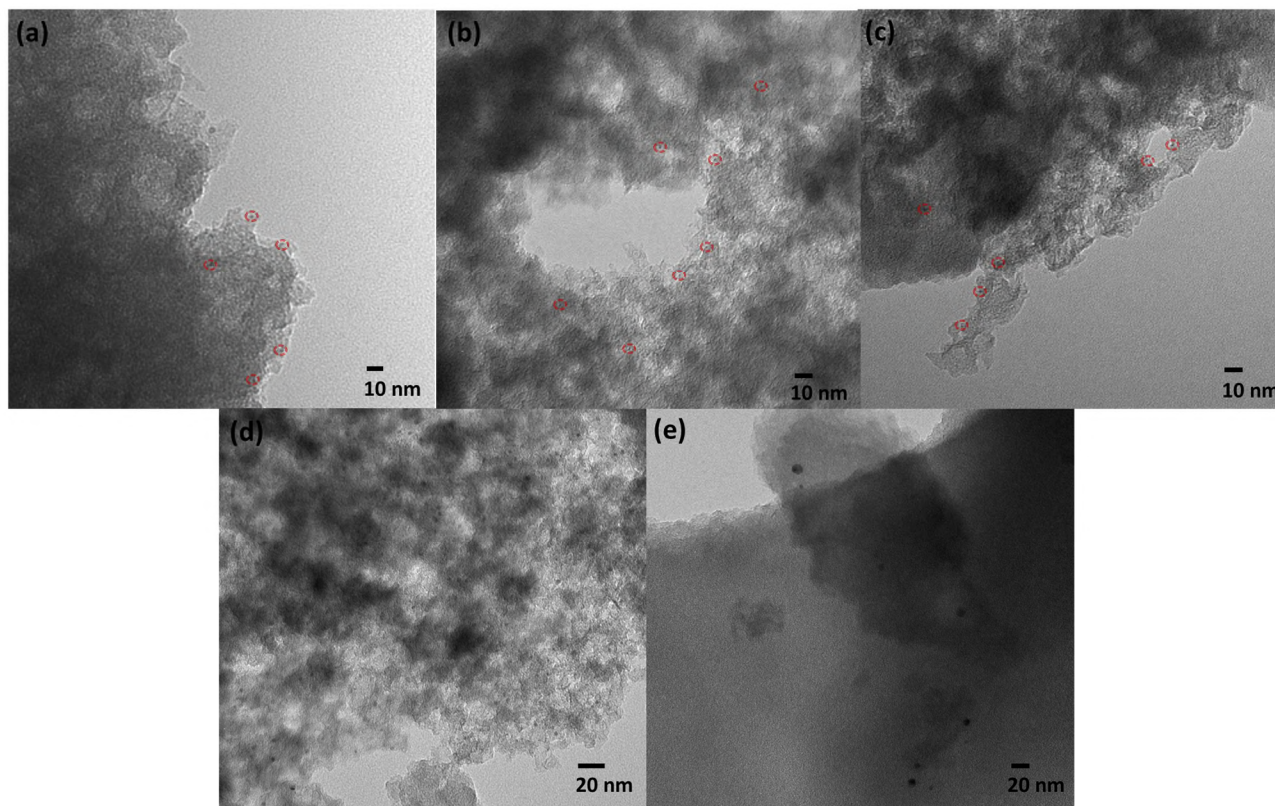

**Fig S8.** TEM images of: (a)  $Pd_3@C$ ; (b)  $Pd_3@C-150$ ; (c)  $Pd_3@C-200$ ; (d)  $Pd_3@C-250$ ; (e)  $Pd_3@C-350$ . Red circles are drawn in (a), (b), and (c) around some of the Pd NCs for ease in visibility.

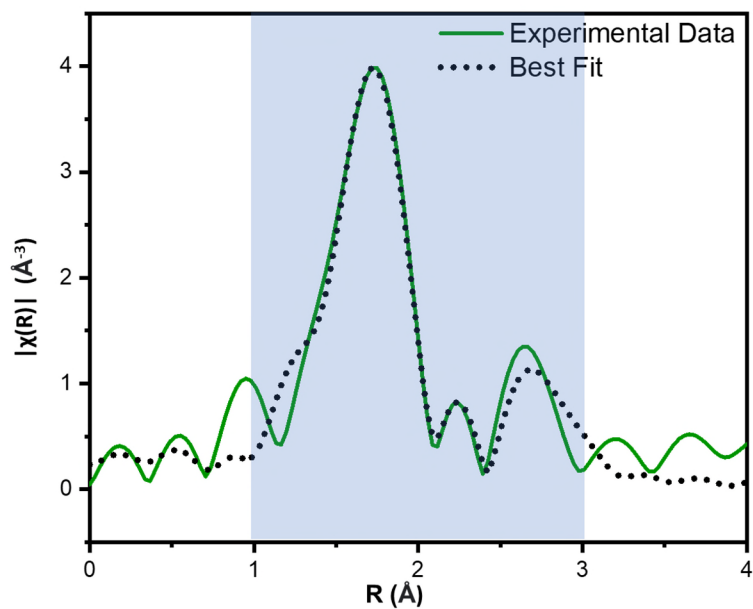

**Fig S9.** Experimental data of the Fourier transformed EXAFS and calculated theoretical best fit for Pd<sub>3</sub>@C. The shaded region represents the fitting region.

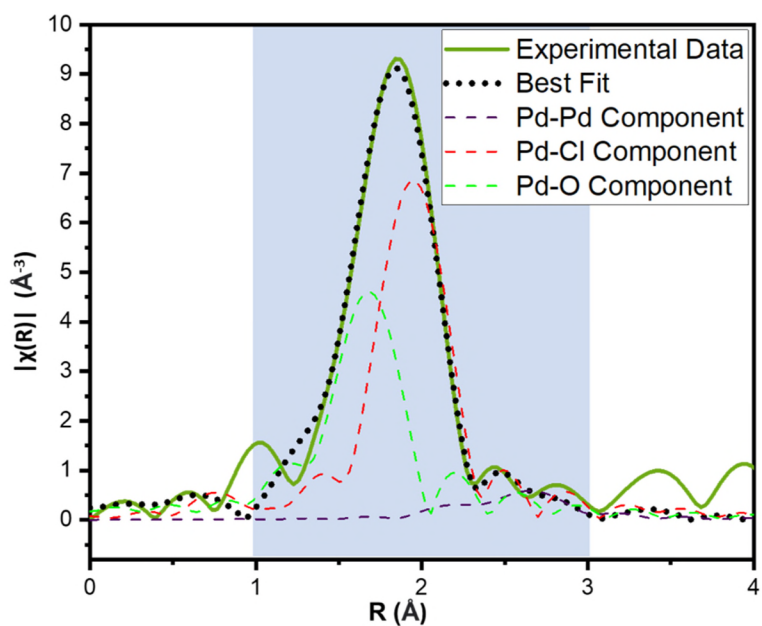

**Fig S10.** Experimental data of the Fourier transformed EXAFS and calculated theoretical best fit for Pd<sub>3</sub>@C-150. The shaded region represents the fitting region.

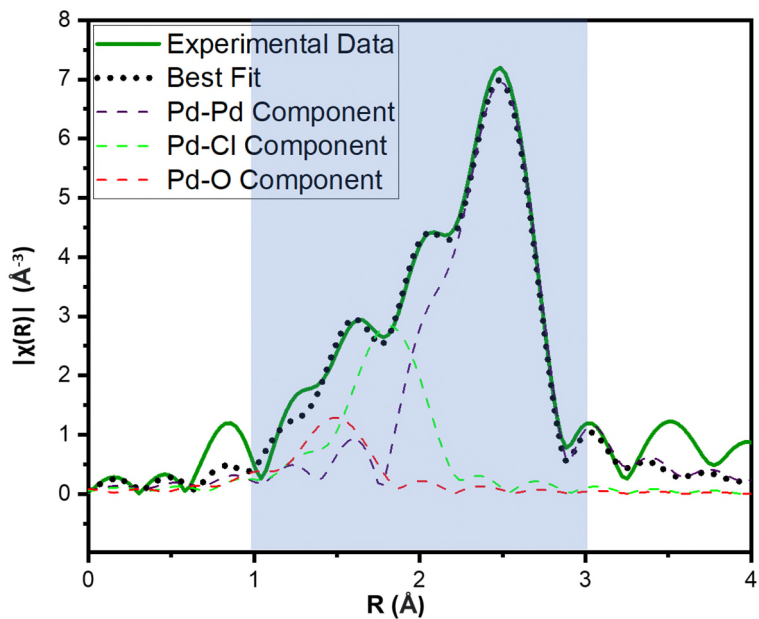

**Fig S11.** Experimental data of the Fourier transformed EXAFS and calculated theoretical best fit for Pd<sub>3</sub>@C-200. The shaded region represents the fitting region.

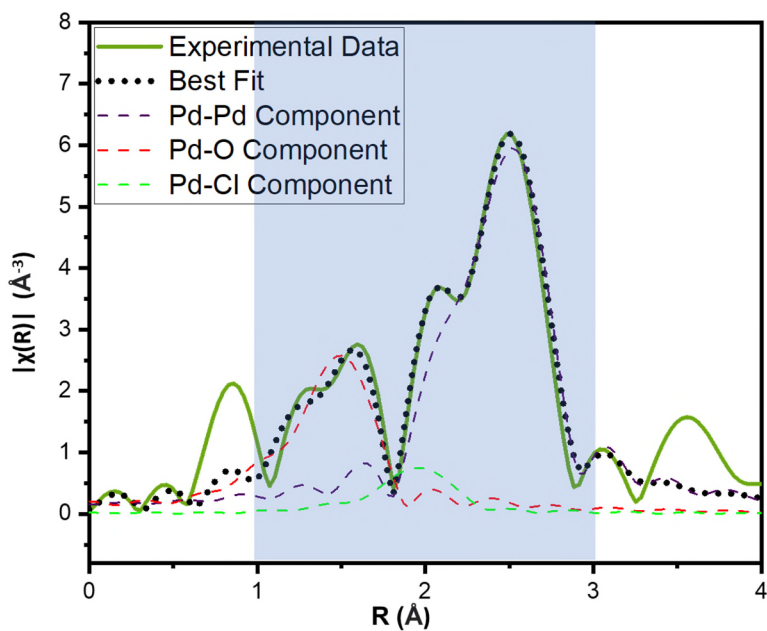

**Fig S12.** Experimental data of the Fourier transformed EXAFS and calculated theoretical best fit for Pd<sub>3</sub>@C-250. The shaded region represents the fitting region.



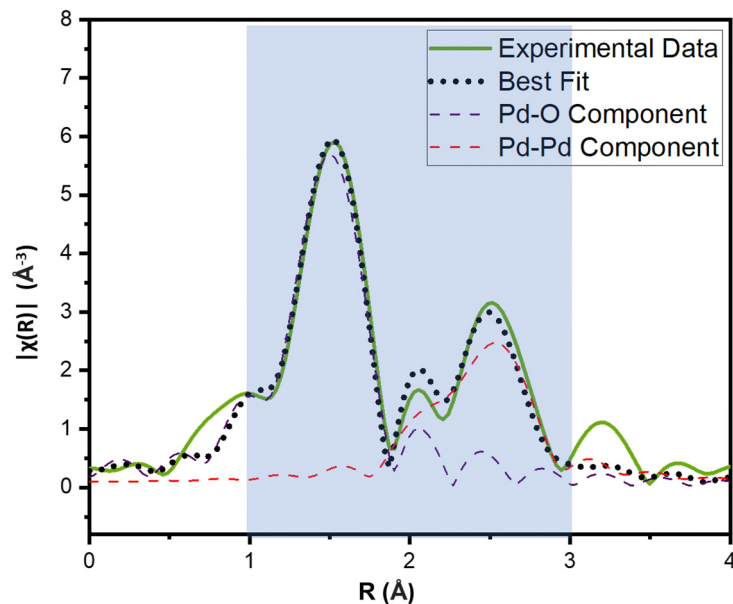

**Fig S13.** Experimental data of the Fourier transformed EXAFS and calculated theoretical best fit for Pd<sub>3</sub>@C-350. The shaded region represents the fitting region.

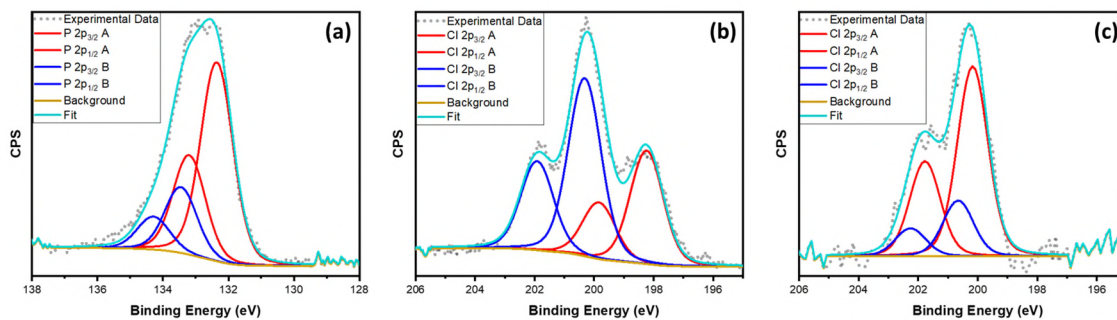

**Fig S14.** (a) XPS P 2p spectra of Pd<sub>3</sub>@C, (b) XPS Cl 2p spectra of Pd<sub>3</sub>@C, and (c) XPS Cl 2p spectra of Pd<sub>3</sub>@C-150; A and B represents two different atoms in distinct electronic environments.

## S1. Validation of Leaching

To show the quenching in the leaching of Pd clusters after activation, we have performed a hot filtration test on the cross-coupling reaction between 4-bromophenol and phenylboronic acid.<sup>1</sup> In this test, two cross-coupling reactions using Pd<sub>3</sub>@C and Pd<sub>3</sub>@C-150 as catalysts were carried out. For the test, 1 mmol of 4-bromophenol, 1.5 mmol of phenyl boronic acid, and 2 mmol of K<sub>2</sub>CO<sub>3</sub> were dissolved in 5 mL of 4:1 DMF:H<sub>2</sub>O mixture. Thereafter, 50 mg of the catalysts were added to the reaction mixture followed by refluxing. After 3 hours from the start of the catalytic reaction, some of the reaction mixture was filtered using a 0.2 μm PTFE syringe filter, and the filtrate was further refluxed in a new flask for 3 more hours. Thereafter, the NMR of the reaction mixture was taken before filtration and 3 hours after filtration. The results of hot filtration tests are shown below in Table S1.

*Table S1. Summarization of hot filtration test Results for the cross-coupling between 4-bromophenol and phenylboronic acid.*

| Catalyst               | Conversion Before Filtration (At 3 hours) | Conversion After Filtration (At 6 hours) |
|------------------------|-------------------------------------------|------------------------------------------|
| Pd <sub>3</sub> @C     | 47.9%                                     | 92.5%                                    |
| Pd <sub>3</sub> @C-150 | 52.6%                                     | 58.2%                                    |

This test shows that in the case of Pd<sub>3</sub>@C, the catalytic process did not stop even after filtration. However, in the case of Pd<sub>3</sub>@C-150, the catalytic process slowed down significantly. This implies that in the case of Pd<sub>3</sub>@C, the Pd clusters are soluble inside the reaction mixture (homogeneous mixture) due to the leaching from the carbon support. As the strong metal-support interaction between Pd and carbon is stronger in the case of Pd<sub>3</sub>@C-150, the majority of the Pd clusters were present on the surface of carbon and acting as heterogeneous catalysts. The small increase in the conversion in the case of Pd<sub>3</sub>@C-150 after filtration may be due to the leaching of Pd(II) ions due to oxidative addition of 4-bromophenol to the Pd clusters.

### Reference:

1. G.K. Rao, A. Kumar, B. Kumar, D. Kumar and A.K. Singh, *Dalt. Trans.*, **2012**, *41*, 1931–1937.
